# Supplementary material
Source: ML conference proceedings conference paper supplement (https://proceedings.neurips.cc/paper_files/paper/2007/hash/6faa8040da20ef399b63a72d0e4ab575-Abstract.html)

# Random Sampling of States in Dynamic Programming (M6)

Christopher G Atkeson and Benjamin Stephens

1. Random grids
2. Local function approximation
3. Local trajectory optimization

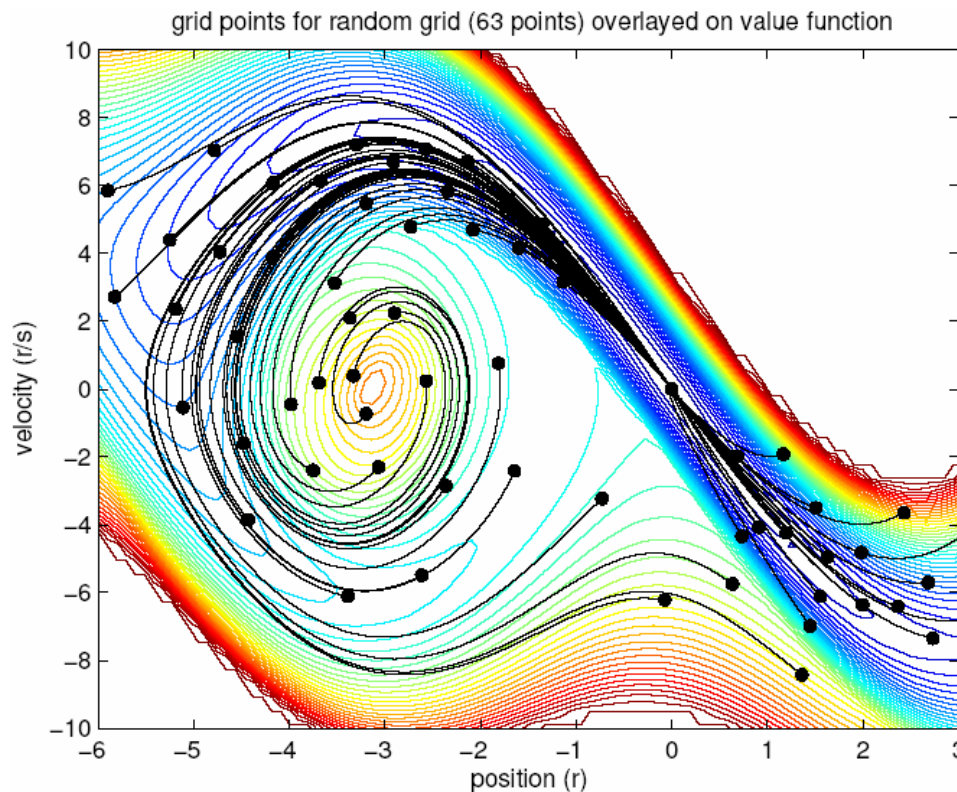

Tested on swingup problems

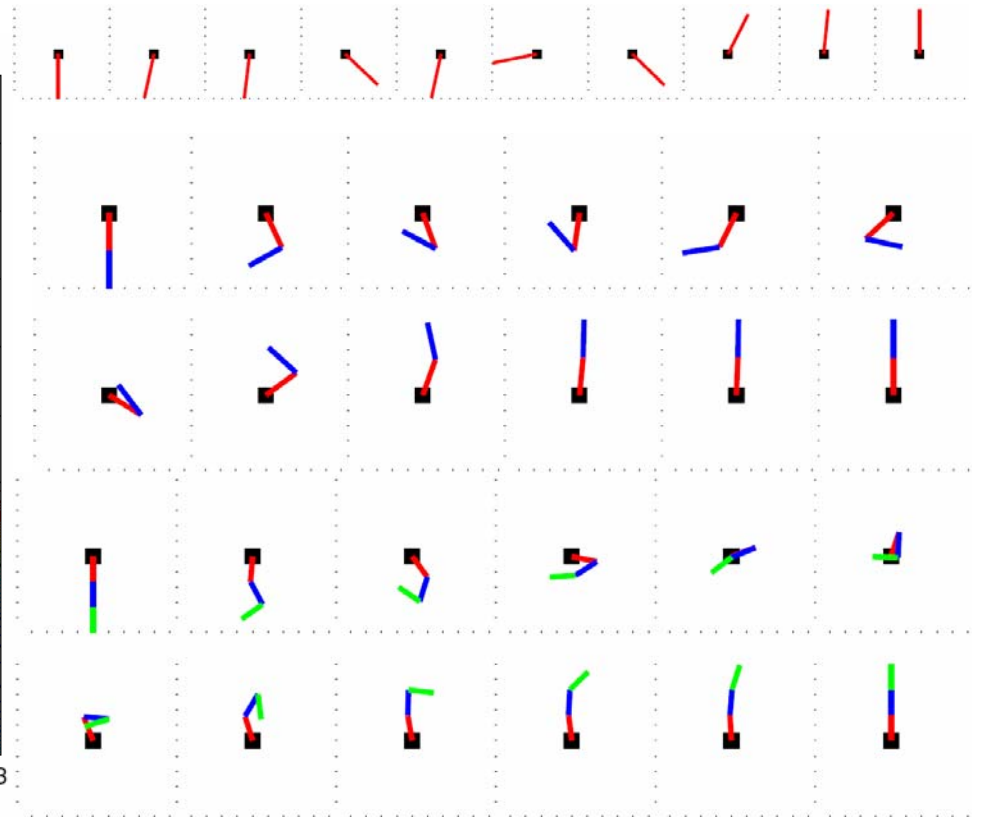

Supplement: Supplementary file 2 [file 6faa8040da20ef399b63a72d0e4ab575-Supplemental.zip]
